# Supplementary material for: Ecological modeling of Cistanche deserticola Y.C. Ma in Alxa, China
Source: PubMed Central journal article supplement (PMC6739506; doi:10.1038/s41598-019-48397-6), 2019-09-11
Supplement: 41598_2019_48397_MOESM1_ESM.pdf [file 41598_2019_48397_MOESM1_ESM.pdf]

## Ecological modeling of *Cistanche deserticola* Y.C.Ma in Alxa, China

Ziyan Li<sup>1</sup>, Chunhong Zhang<sup>1</sup>, Guanyao Ren<sup>5</sup>, Min Yang<sup>1</sup>, Shoudong Zhu<sup>2\*</sup> & Minhui Li<sup>1,3,4\*</sup>

<sup>1</sup>Inner Mongolia key Laboratory of Characteristic Geoherbs Resources Protection and Utilization, Baotou Medical College, Baotou, China.

<sup>2</sup>State Key Laboratory of Dao-di Herbs, National Resource Center for Chinese Materia Medica, China Academy of Chinese Medical Sciences, Beijing, China.

<sup>3</sup>Inner Mongolia Institute of Traditional Chinese Medicine, Hohhot, China.

<sup>4</sup>Guangxi Key Laboratory of Medicinal Resources Protection and Genetic Improvement, Guangxi Botanical Garden of Medicinal Plants, Nanning, China.

<sup>5</sup>Inner Mongolia Institute of Aerial Remote Sensing Surveying and Mapping, Hohhot, China.

### Supplementary Material

#### Appendix 1. Information about *Cistanche deserticola* Y.C.Ma samples

| No. | East Longitude | Northern Latitude | Sampling Time | Sample Collection Area |
|-----|----------------|-------------------|---------------|------------------------|
| Y-1 | 102°77'27"     | 40°50'20"         | 2015.04       | Alxa Right Banner      |
| Y-2 | 102°69'71"     | 40°49'55"         | 2015.04       | Alxa Right Banner      |
| Y-3 | 102°71'10"     | 40°43'83"         | 2015.04       | Alxa Right Banner      |
| Y-4 | 102°74'28"     | 40°56'15"         | 2015.04       | Alxa Right Banner      |
| Y-5 | 102°86'45"     | 40°49'76"         | 2015.04       | Alxa Right Banner      |
| Y-6 | 102°63'28"     | 40°46'29"         | 2015.04       | Alxa Right Banner      |

\* Corresponding Author

Li MH Tel: +86-472-716 7795, E-mail: prof\_liminhui@yeah.net; Zhu SD Tel: +86-010- 64087734, E-mail: seaky2002@163.com

---

|      |            |           |         |                   |
|------|------------|-----------|---------|-------------------|
| Y-7  | 102°93'65" | 40°54'03" | 2015.04 | Alxa Right Banner |
| Y-8  | 103°18'04" | 40°48'20" | 2015.04 | Alxa Right Banner |
| Y-9  | 103°66'99" | 41°13'83" | 2015.04 | Alxa Right Banner |
| Y-10 | 102°51'34" | 40°48'27" | 2015.04 | Alxa Right Banner |
| Y-11 | 102°55'33" | 40°39'70" | 2015.04 | Alxa Right Banner |
| Y-12 | 102°67'71" | 40°37'80" | 2015.04 | Alxa Right Banner |
| Y-13 | 102°78'64" | 40°39'32" | 2015.04 | Alxa Right Banner |
| Y-14 | 102°77'49" | 40°45'89" | 2015.04 | Alxa Right Banner |
| Y-15 | 102°83'43" | 40°44'81" | 2015.04 | Alxa Right Banner |
| Y-16 | 102°63'86" | 40°42'02" | 2015.04 | Alxa Right Banner |
| Y-17 | 102°86'53" | 40°39'46" | 2015.04 | Alxa Right Banner |
| Y-18 | 102°91'53" | 40°40'18" | 2015.04 | Alxa Right Banner |
| Y-19 | 102°88'37" | 40°43'86" | 2015.04 | Alxa Right Banner |
| Y-20 | 102°89'86" | 40°46'60" | 2015.04 | Alxa Right Banner |
| Y-21 | 102°92'89" | 40°51'18" | 2015.04 | Alxa Right Banner |
| Y-22 | 102°81'41" | 40°48'62" | 2015.04 | Alxa Right Banner |
| Y-23 | 102°99'08" | 40°51'60" | 2015.04 | Alxa Right Banner |
| Y-24 | 102°73'06" | 40°46'86" | 2015.04 | Alxa Right Banner |
| Y-25 | 102°75'39" | 40°42'57" | 2015.04 | Alxa Right Banner |
| E-1  | 100°89'49" | 40°87'52" | 2015.04 | Ejin Banner       |
| E-2  | 100°93'48" | 40°88'46" | 2015.04 | Ejin Banner       |
| E-3  | 101°94'72" | 41°48'10" | 2015.04 | Ejin Banner       |
| E-4  | 98°38'62"  | 41°04'25" | 2015.04 | Ejin Banner       |
| E-5  | 100°89'79" | 41°05'28" | 2015.04 | Ejin Banner       |
| E-6  | 100°90'95" | 40°90'74" | 2015.04 | Ejin Banner       |
| E-7  | 102°95'14" | 41°38'90" | 2015.04 | Ejin Banner       |

---

---

|      |            |           |         |                  |
|------|------------|-----------|---------|------------------|
| E-8  | 101°41'93" | 41°06'88" | 2015.04 | Ejin Banner      |
| E-9  | 101°47'53" | 41°07'20" | 2015.04 | Ejin Banner      |
| E-10 | 100°99'18" | 41°79'49" | 2015.04 | Ejin Banner      |
| E-11 | 98°90'83"  | 41°93'12" | 2015.05 | Ejin Banner      |
| E-12 | 97°41'97"  | 42°41'51" | 2015.05 | Ejin Banner      |
| E-13 | 98°73'13"  | 40°95'12" | 2015.05 | Ejin Banner      |
| E-14 | 102°06'82" | 41°40'57" | 2015.05 | Ejin Banner      |
| E-15 | 98°57'17"  | 41°83'19" | 2015.05 | Ejin Banner      |
| E-16 | 98°43'69"  | 41°01'40" | 2015.05 | Ejin Banner      |
| E-17 | 100°95'80" | 40°91'21" | 2015.05 | Ejin Banner      |
| E-18 | 101°51'69" | 41°47'53" | 2015.05 | Ejin Banner      |
| E-19 | 101°36'77" | 40°97'13" | 2015.05 | Ejin Banner      |
| E-20 | 101°79'06" | 41°50'28" | 2015.05 | Ejin Banner      |
| E-21 | 101°94'69" | 41°53'33" | 2015.05 | Ejin Banner      |
| E-22 | 102°91'91" | 41°41'47" | 2015.05 | Ejin Banner      |
| Z-1  | 106°21'61" | 40°30'44" | 2015.05 | Alxa Left Banner |
| Z-2  | 105°25'43" | 40°28'35" | 2015.05 | Alxa Left Banner |
| Z-3  | 105°30'52" | 40°27'48" | 2015.05 | Alxa Left Banner |
| Z-4  | 105°31'71" | 40°22'53" | 2015.05 | Alxa Left Banner |
| Z-5  | 105°25'74" | 40°20'34" | 2015.05 | Alxa Left Banner |
| Z-6  | 105°21'86" | 40°21'86" | 2015.05 | Alxa Left Banner |
| Z-7  | 105°28'57" | 40°31'90" | 2015.05 | Alxa Left Banner |
| Z-8  | 105°17'19" | 40°26'00" | 2015.05 | Alxa Left Banner |
| Z-9  | 106°22'78" | 40°33'60" | 2015.05 | Alxa Left Banner |
| Z-10 | 105°26'71" | 40°25'24" | 2015.05 | Alxa Left Banner |
| Z-11 | 105°16'86" | 40°21'29" | 2015.05 | Alxa Left Banner |

---

|      |            |           |         |                  |
|------|------------|-----------|---------|------------------|
| Z-12 | 106°25'45" | 40°31'78" | 2015.05 | Alxa Left Banner |
| Z-13 | 105°52'74" | 40°75'59" | 2015.05 | Alxa Left Banner |
| Z-14 | 106°28'46" | 40°32'87" | 2015.05 | Alxa Left Banner |
| Z-15 | 105°67'76" | 39°93'35" | 2015.05 | Alxa Left Banner |
| Z-16 | 105°22'06" | 40°25'06" | 2015.05 | Alxa Left Banner |
| Z-17 | 104°66'46" | 41°35'47" | 2015.05 | Alxa Left Banner |
| Z-18 | 106°29'82" | 40°30'16" | 2015.05 | Alxa Left Banner |

Note: Y stands for Alxa Right Banner, E stands for Ejin Banner and Z stands for Alxa Left Banner.

#### **Appendix 2. Contribution of Ecological Factors to *Cistanche deserticola***

| <b>No.</b> | <b>Ecological Factors</b>                          | <b>Contribution (%)</b> |
|------------|----------------------------------------------------|-------------------------|
| 1          | Soil Type                                          | 25.3                    |
| 2          | Annual Sunshine Duration                           | 23.2                    |
| 3          | Temperature Seasonality (standard deviation × 100) | 22.5                    |
| 4          | Vegetation Type                                    | 6.8                     |
| 5          | Mean Temperature in July                           | 3.7                     |
| 6          | Altitude                                           | 3.5                     |
| 7          | Sunshine Duration in the Growing Season            | 3.1                     |
| 8          | Mean precipitation in August                       | 2.5                     |
| 9          | Max Temperature of Warmest Month                   | 1.7                     |
| 10         | Humid Index                                        | 1.6                     |
| 11         | Sunshine Duration in June                          | 1.6                     |
| 12         | Slope                                              | 1.4                     |

|    |                                    |     |
|----|------------------------------------|-----|
| 13 | Mean Temperature in March          | 0.7 |
| 14 | Soil Clay Content                  | 0.7 |
| 15 | Soil Available Water Content Level | 0.6 |
| 16 | Mean Precipitation in May          | 0.3 |
| 17 | Mean Temperature in May            | 0.3 |
| 18 | Annual Mean Temperature            | 0.2 |
| 19 | Soil Sand Content                  | 0.1 |
| 20 | Isothermality                      | 0.1 |
| 21 | Aspect                             | 0.1 |

**Appendix 3. Echinoid and Acteoside content in *C. deserticola* samples ( $\bar{x} \pm s, n = 3$ )**

| No.  | Content of Echinoid (%) | Content of Acteoside (%) | No.  | Content of Echinoid (%) | Content of Acteoside (%) |
|------|-------------------------|--------------------------|------|-------------------------|--------------------------|
| Y-1  | 0.26±0.04               | 0.14±0.03                | E-9  | 0.39±0.06               | 0.35±0.06                |
| Y-2  | 0.90±0.13               | 0.19±0.02                | E-10 | 0.42±0.07               | 0.47±0.11                |
| Y-3  | 0.75±0.17               | 0.47±0.07                | E-11 | 0.27±0.05               | 0.15±0.03                |
| Y-4  | 0.28±0.09               | 0.19±0.02                | E-12 | 0.24±0.07               | 0.14±0.02                |
| Y-5  | 1.21±0.22               | 0.22±0.03                | E-13 | 0.31±0.02               | 0.91±0.07                |
| Y-6  | 0.54±0.12               | 0.57±0.04                | E-14 | 0.99±0.10               | 0.63±0.04                |
| Y-7  | 0.24±0.10               | 0.22±0.04                | E-15 | 0.26±0.01               | 0.14±0.02                |
| Y-8  | 1.33±0.08               | 0.32±0.05                | E-16 | 0.37±0.02               | 0.15±0.01                |
| Y-9  | 0.83±0.02               | 0.59±0.03                | E-17 | 0.97±0.06               | 1.15±0.16                |
| Y-10 | 0.70±0.04               | 0.31±0.02                | E-18 | 1.91±0.23               | 0.67±0.09                |
| Y-11 | 1.30±0.06               | 0.98±0.07                | E-19 | 1.11±0.04               | 1.08±0.16                |
| Y-12 | 0.23±0.04               | 0.18±0.01                | E-20 | 0.18±0.01               | 0.52±0.08                |

---

|      |           |           |      |           |           |
|------|-----------|-----------|------|-----------|-----------|
| Y-13 | 0.93±0.13 | 0.54±0.01 | E-21 | 0.16±0.02 | 0.63±0.08 |
| Y-14 | 0.53±0.11 | 1.10±0.09 | E-22 | 0.30±0.02 | 0.23±0.02 |
| Y-15 | 1.28±0.27 | 0.33±0.03 | Z-1  | 1.14±0.09 | 0.39±0.03 |
| Y-16 | 1.16±0.07 | 0.61±0.07 | Z-2  | 0.16±0.01 | 0.09±0.03 |
| Y-17 | 1.02±0.20 | 0.92±0.04 | Z-3  | 0.29±0.03 | 0.30±0.07 |
| Y-18 | 1.89±0.12 | 0.56±0.01 | Z-4  | 1.37±0.07 | 0.34±0.03 |
| Y-19 | 0.64±0.09 | 0.60±0.04 | Z-5  | 1.07±0.04 | 1.0±0.16  |
| Y-20 | 0.71±0.02 | 0.34±0.08 | Z-6  | 0.31±0.01 | 0.05±0.01 |
| Y-21 | 1.40±0.33 | 1.00±0.08 | Z-7  | 0.36±0.03 | 0.72±0.12 |
| Y-22 | 0.34±0.04 | 0.86±0.10 | Z-8  | 0.76±0.10 | 1.12±0.21 |
| Y-23 | 1.94±0.25 | 0.78±0.04 | Z-9  | 0.84±0.17 | 0.61±0.07 |
| Y-24 | 1.07±0.12 | 0.70±0.06 | Z-10 | 0.21±0.02 | 0.18±0.02 |
| Y-25 | 1.07±0.09 | 0.75±0.14 | Z-11 | 0.71±0.06 | 0.75±0.09 |
| E-1  | 0.31±0.01 | 0.93±0.04 | Z-12 | 0.31±0.05 | 0.08±0.01 |
| E-2  | 0.77±0.11 | 0.80±0.09 | Z-13 | 0.38±0.02 | 0.10±0.01 |
| E-3  | 0.74±0.01 | 0.22±0.06 | Z-14 | 0.22±0.01 | 0.10±0.01 |
| E-4  | 0.83±0.13 | 0.31±0.10 | Z-15 | 0.27±0.02 | 0.05±0.02 |
| E-5  | 0.16±0.04 | 0.66±0.17 | Z-16 | 0.32±0.01 | 0.05±0.01 |
| E-6  | 1.24±0.11 | 0.19±0.04 | Z-17 | 0.19±0.01 | 0.11±0.03 |
| E-7  | 0.24±0.04 | 0.53±0.07 | Z-18 | 0.33±0.03 | 0.10±0.02 |
| E-8  | 0.42±0.06 | 1.67±0.26 |      |           |           |

---

Note: Y stands for Alxa Right Banner, E stands for Ejina Banner and Z stands for Alxa Left Banner.

#### Appendix 4. Correlation among Echinoid, Acteoside, pHGs and Ecological factors

| Ecological factors                                 | Index ingredients |           |          |
|----------------------------------------------------|-------------------|-----------|----------|
|                                                    | Echinoid          | Acteoside | pHGs     |
| Soil Type                                          | 0.149             | 0.187     | 0.202    |
| Annual Sunshine Duration                           | 0.129             | 0.125     | 0.155    |
| Temperature Seasonality (standard deviation × 100) | 0.187             | 0.105     | 0.184    |
| Vegetation Type                                    | -0.158            | 0.001     | -0.109   |
| Mean Temperature in July                           | 0.230             | 0.153     | 0.240    |
| Altitude                                           | -0.223            | -0.112    | -0.213   |
| Sunshine Duration in the Growing Season            | 0.217             | 0.135     | 0.221    |
| Mean precipitation in August                       | -0.441**          | -0.149    | -0.384** |
| Max Temperature of Warmest Month                   | 0.246*            | 0.168     | 0.259*   |
| Humid Index                                        | -0.389**          | -0.115    | -0.330** |
| Sunshine Duration in June                          | 0.434**           | 0.424**   | 0.524**  |
| Slope                                              | -0.031            | 0.053     | 0.006    |
| Mean Temperature in March                          | 0.392**           | 0.426**   | 0.549**  |
| Soil Clay Content                                  | 0.250*            | 0.200     | 0.278*   |
| Soil Available Water Content Level                 | -0.035            | -0.159    | -0.108   |
| Mean Precipitation in May                          | -0.599**          | -0.374**  | -0.612** |
| Mean Temperature in May                            | 0.243             | 0.169     | 0.258*   |
| Annual Mean Temperature                            | 0.220             | 0.129     | 0.221    |
| Soil Sand Content                                  | -0.128            | -0.187    | -0.187   |
| Isothermality                                      | 0.219             | 0.113     | 0.211    |
| Aspect                                             | -0.196            | -0.064    | -0.170   |

\*\* Correlation significant at the 0.01 (bilateral) level.

\* Correlation significant at the 0.05 (bilateral) level.

**Appendix 5. Total Variance Explained**

| component | Initial Eigenvalues |               |              | Extraction Sums of Squared Loadings |               |              |
|-----------|---------------------|---------------|--------------|-------------------------------------|---------------|--------------|
|           | Total               | % of Variance | Cumulative % | Total                               | % of Variance | Cumulative % |
| 1         | 9.549               | 45.471        | 45.471       | 9.549                               | 45.471        | 45.471       |
| 2         | 3.670               | 17.474        | 62.945       | 3.670                               | 17.474        | 62.945       |
| 3         | 1.956               | 9.314         | 72.258       | 1.956                               | 9.314         | 72.258       |
| 4         | 1.079               | 5.140         | 77.399       | 1.079                               | 5.140         | 77.399       |
| 5         | .976                | 4.645         | 82.044       |                                     |               |              |
| 6         | .827                | 3.940         | 85.984       |                                     |               |              |
| 7         | .679                | 3.233         | 89.217       |                                     |               |              |
| 8         | .560                | 2.666         | 91.884       |                                     |               |              |
| 9         | .483                | 2.300         | 94.184       |                                     |               |              |
| 10        | .350                | 1.668         | 95.852       |                                     |               |              |
| 11        | .271                | 1.289         | 97.141       |                                     |               |              |
| 12        | .201                | .957          | 98.098       |                                     |               |              |
| 13        | .131                | .626          | 98.724       |                                     |               |              |
| 14        | .113                | .536          | 99.260       |                                     |               |              |
| 15        | .071                | .339          | 99.599       |                                     |               |              |
| 16        | .058                | .274          | 99.873       |                                     |               |              |
| 17        | .013                | .062          | 99.935       |                                     |               |              |
| 18        | .008                | .037          | 99.972       |                                     |               |              |
| 19        | .004                | .020          | 99.992       |                                     |               |              |
| 20        | .002                | .007          | 100.000      |                                     |               |              |
| 21        | 9.260E-005          | .000          | 100.000      |                                     |               |              |

Extraction method: Principal Component Analysis.
